# Supplementary material for: Role of women’s empowerment in the relationship between women’s education and utilization of skilled birth attendants in Tach Gayint district, Northwest Ethiopia, mediation analysis, 2023
Source: Research Square preprint supplement (doi:10.21203/rs.3.rs-5901644/v1), 2026-01-29

UNIVERSITY OF GONDAR

COLLEGE OF MEDICINE AND HEALTH SCIENCES

DEPARTMENT OF EPIDEMIOLOGY AND BIOSTATISTICS

**Annex I: Information Sheet and Consent Form**:

(English Version) Information Sheet Greetings! Hello! Dear respondents my name is Fikirte Adane and I am working as a data collector for the study being conducted in this kebele by Mr. Atirsaw Assefa who is studying for his master’s degree at the University of Gondar, college of medicine and health science, department of Epidemiology and Biostatistics. I kindly request you to lend me your attention to explain to you about the study and how you have been selected as a study participant.

**Study title**: magnitude of skilled birth attendance and role of women’s empowerment between education and skilled birth attendance among women who gave birth in the last 24 months in Tach Gayint District, Northwest, Ethiopia, mediation analysis, 2023.

**Purpose:** To determine the mediation effect of women’s empowerment in the relationship between education and skilled birth attendance among women who gave birth in the last 24 months in Tach Gayint District, Northwest, Ethiopia, 2023.

**Procedure and duration**: First, I selected you to take part in this study randomly. There are different questions to answer. The interview questionnaire will be taking 20-30 minutes.

**Risks:** The risks of participating in this study are minimal, only taking a few minutes.

**Benefit:** At this moment, you may not get any direct benefit by being involved in this study but the information you provide is very important to solve problems by increasing women’s empowerment

**Confidentiality:** The information that you provide us will be confidential. The questionnaire will be coded to exclude showing your name on the questionnaire and consent form.

**Rights:** Participation in this study is voluntary. You have the right to declare not to participate in this study and you have the right to withdraw from participating at any time. **Contact address:** If there is any questions or unclear idea at any time about the study or the procedures, do not hesitate to contact and speak to the principal investigator at the cell phone number: 0928437676 or e-mail address [assefatirsaw@gmail.com.](assefatirsaw@gmail.com.%20)

**Consent Form**

I have read the information sheet concerning this study (or have understood the verbal explanation) and I understand what will be required of me and what will happen to me if I take part in it. I also understand that any time I may withdraw from this study without giving a reason and without my or my family’s routine service utilization being affected by my refusal.

Participant’s signature ___________________ Date___________________

Interviewer's signature certifying that the informed consent will be given verbally.

Interview’s name ______________

Interview’s signature ______________ Date ______________

**May I continue the interview?**

1. Yes ____________Continue the interview

2. No ______________Stop the interview and thank the respondent

**Result: (to confirm for completeness)**

A. Questionnaire completed _____________

B. Questionnaire partially completed _____________

C. Participant refused _____________

D. Others (Please Specify) _____________

**Checked by Supervisor**:

Supervisor’s Name _____________

Supervisor’s Signature _____________ Date ____________

**Annex II፡ የፈቃድ መግለጫ ቅጽ እና የስምምነት ፍቃድ (የአማረኛ ቅጂ)**

ውድ ተሳታፊዎች ስሜ አትርሳው አሰፋ እባላለሁ በጎንደር ዩኒቨርሲቲ ህክምናና ጤና ሳይንስ ኮሌጅ የህብረተሰብ ጤና ኢንስቲትዩት የኢፒዲሚዮሎጂ እና ባዮስታስቲክስ ትምህርት ክፍል ተመራቂ ተማሪ ነኝ። ለማስተር ኘሮግራም ከሚያስፈልጉት መስፈርቶች አንዱ ምርምር ማድረግ ነው፡፡ የዚህ ጥናት አላማ በሴቶች ትምህርት እና በሰለጠነ የወሊድ ረዳት አጠቃቀም መካከል ባለው ግንኙነት ውስጥ የሴቶችን የማጎልበት ሚና በመገምገም ላይ ጥናት ላካሂድ ነው። እናቶች በሰለጠነ የወሊድ ረዳት አለመውለድ ከሚያመጡት የጤና ችግሮች ውስጥ የጭቅላ ህጻናት እና የእናቶች ሞት ሲሆኑ፤ ይህን ለመቀነስ የእናቶችን አቅም ማጎልበት ያስፈልጋል፡፡ ስለ ጥናቱ ዓላማ እና አጠቃላይ ሁኔታ ለእርስዎ ለማስረዳት ትኩረትዎን እንዲሰጡኝ በአክብሮት እጠይቃለሁ።

**የጥናቱ ዓላማ** ባለፉት 24 ወራት ውስጥ በወለዱ ሴቶች በታች ጋይንት ወረዳ፣ ሰሜን ምዕራብ ኢትዮጵያ፣ 2023 እ.ኤ.አ በተማሩ እናቶች እና በሰለጠነ የወሊድ ረዳት አጠቃቀም መካከል ባለው ግንኙነት የሴቶችን ማብቃት ያለውን የሽምግልና ውጤት ለመወሰን።

በዚህ ጥናት ላይ ለመሳተፍ በዘፈቀደ ተመርጠዋል እና ተሳትፎዎ በፍላጎትዎ ላይ ብቻ የተመሰረተ ነው። ምላሽዎን ማንም አይደርስበትም፣ እና የእርስዎን ስም ወይም ስልክ ቁጥር እንዲሰጡ አይጠበቅብዎትም። በዚህ ጥናት ውስጥ ላለመሳተፍ መብት አለዎት እና በማንኛውም ጊዜ ለማቆም መብት አለዎት. ጥናቱ ለእርስዎ ቀጥተኛ ጥቅም ላይኖረው ይችላል። ነገር ግን ያቀረቡት መረጃ የሴቶችን አቅም በማሳደግ ችግሮችን ለመፍታት በጣም አስፈላጊ ነው። በዚህ ጥናት ውስጥ በመሳተፋችሁ ምክንያት የሚደርስባችሁ ምንም አይነት ስጋት የለም። በመጠይቁ ላይ የተሰጡ ምላሾች በሙሉ የኮዲንግ ሲስተም በመጠቀም ሚስጥራዊ ይሆናሉ። የእርስዎ መልሶች ሙሉ ለሙሉ ግላዊ ናቸው። አለመቀበል፣ ማንኛውንም ወይም ሁሉንም ጥያቄዎች መመለስ ሙሉ መብትህ ነው። በማንኛውም ጊዜ እምቢ ለማለት እና የመውጣት ሙሉ መብት አልዎት።

ስለ ጥናቱ የበለጠ ለማወቅ ከፈለጉ ወይም በጥናቱ ላይ ጥርጣሬ ካለዎት ከዚህ በታች ባለው አድራሻ ማግኘት ይችላሉ፡-

አትርሳው አሰፋ ስልክ፡- +251928437676 ኢሜል፡- <assefatirsaw@gmail.com>

ለጊዜዎት አመሰግናለሁ!

**የስምምነት ፍቃድ (የአማረኛ ቅጂ)**

በዚህ ጥናት ውስጥ ያለኝ ተሳትፎ በፈቃደኝነት እንደሆነ ተረድቻለሁ። የጥናት አላማው፣ ሂደቱ እና ተረድቻለሁ፡፡ እና የማላውቀውን ጥያቄ ያለመመለስ መብት እንዳለኝ ተረድቻለሁ፡፡ ከዚህ ጥናት የሚገኘው መረጃ በጥብቅ ሚስጥራዊ እንደሚሆን ተረድቻለሁ። ማንኛውንም ጥያቄ የመጠየቅ መብት እንዳለኝ ተረድቻለሁ። ይህ ጥናት በታች ጋይንት ወረዳ ውስጥ ሴቶችን ማጎልብት ለሚመለከተው ጽ/ቤት እና ለሌሎች መንግሥታዊ ያልሆኑ ድርጅቶች በመሰራጨት እናቶች በሰለጠነ የወሊድ ረዳት እንዲጠቀሙ ተገቢውን ስልት ለመንደፍ ሊያስችል ይችላል። በዚህ ጥናት ላይ ለመሳተፍ በፈቃደኝነት መስማማቴን ከታች ባለው ቅፅ ላይ በፊርማዬ አረጋግጣለሁ።

አዎ አይ

አዎ ካሉ ፍርማዎትን ከዚህ ያስቀመጡ

ምላሽ ሰጪ (የጥናቱ ተሳታፊ) ፊርማ ፡ _____________________ ቀን፡ ________/_________/2015 ዓ/ም

የመረጃ ሰበረሳበው ስም ፡ ________________ ፊርማ________­­­­­_____ቀን፡ ________/_________/2015 ዓ/ም

**Annex III: Ethical clearance**


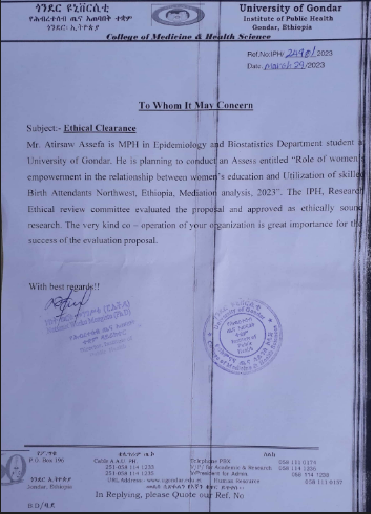

Supplement: Supplementary file 1 [file cfe1f22b7c9078e7bb8fe264.docx]
